# Supplementary material for: Among respiratory symptoms, wheeze associates most strongly with impaired lung function in adults with asthma: a long-term prospective cohort study
Source: HighWire-hosted journal article supplement (doi:10.1136/bmjresp-2021-000981), 2021-07-01
Supplement: bmjresp-2021-000981supp001_data_supplement.pdf [file bmjresp-2021-000981supp001_data_supplement.pdf]

## SUPPLEMENTAL MATERIAL

| <b>Supplemental Table 1 Characteristics at follow-up among women, men and all participants</b> |                        |                      |                      |
|------------------------------------------------------------------------------------------------|------------------------|----------------------|----------------------|
| <b>Characteristics</b>                                                                         | <b>Women<br/>N=545</b> | <b>Men<br/>N=432</b> | <b>All<br/>N=977</b> |
| Age Mean (SD) in years                                                                         | 58.7 (12.8)            | 59.4 (12.0)          | 59.0 (12.4)          |
| BMI Mean (SD)                                                                                  | 28.2 (5.5)             | 28.9 (4.5)           | 28.5 (5.1)           |
| BMI group                                                                                      |                        |                      |                      |
| Underweight (BMI<20)                                                                           | 17 (3.1)               | 2 (0.5)              | 19 (1.9)             |
| Normal (20<=BMI<25)                                                                            | 144 (26.4)             | 72 (16.7)            | 216 (22.1)           |
| Overweight (25<=BMI<30)                                                                        | 211 (38.7)             | 207 (47.9)           | 418 (42.8)           |
| Obese (BMI=>30)                                                                                | 173 (31.7)             | 150 (34.7)           | 323 (33.1)           |
| BMI missing                                                                                    | 0 (0)                  | 1 (0.2)              | 1 (0.1)              |
| BMI change Mean (SD)                                                                           | 3.0 (4.0)              | 2.8 (3.1)            | 2.9 (3.6)            |
| High BMI increase (>4.92)                                                                      | 143 (26.2)             | 94 (21.2)            | 237 (24.2)           |
| Smoking habits                                                                                 |                        |                      |                      |
| Non-smoker                                                                                     | 268 (49.2)             | 199 (46.1)           | 467 (47.8)           |
| Ex-smoker                                                                                      | 207 (38.0)             | 189 (43.8)           | 396 (40.5)           |
| Current smoker                                                                                 | 70 (12.8)              | 44 (10.2)            | 114 (11.7)           |
| Inhaled corticosteroid use                                                                     | 265 (48.6)             | 164 (38.0)           | 429 (43.9)           |
| Work GDF exposure                                                                              | 112 (20.6)             | 259 (60.0)           | 371 (38.0)           |
| ER visits last 12 months                                                                       | 50 (9.2)               | 25 (5.8)             | 75 (7.7)             |
| Hospitalizations las 12 months                                                                 | 10 (1.8)               | 10 (2.3)             | 20 (2)               |
| Oral corticosteroid use                                                                        |                        |                      |                      |
| Maintenance treatment                                                                          | 2 (0.4)                | 1 (0.2)              | 3 (0.3)              |
| Only with exacerbations                                                                        | 11 (2)                 | 3 (0.7)              | 14 (1.4)             |
| BMI missing at follow-up = 1 man                                                               |                        |                      |                      |
| BMI change was calculated for 531 women and 420 men.                                           |                        |                      |                      |

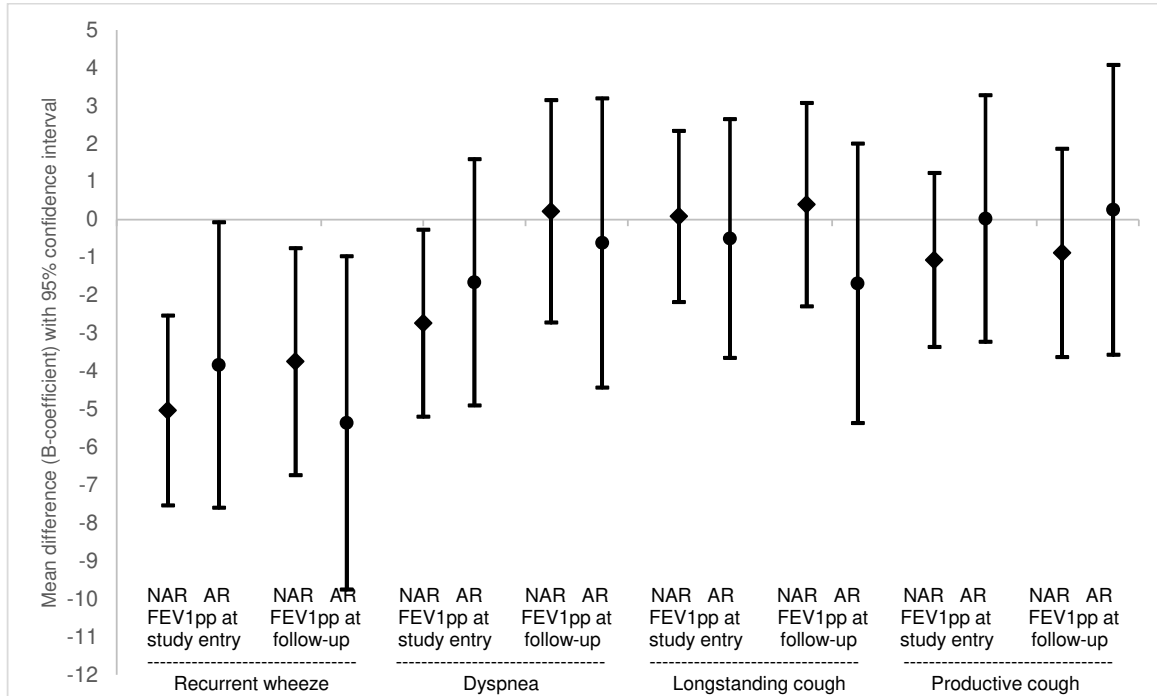

**Supplemental Figure 1 Association of type of respiratory symptoms at study entry with FEV<sub>1</sub>pp at study entry and follow-up after adjusting for other factors among those with and without allergic rhinitis. Results expressed as B-coefficients with 95% confidence intervals from linear regression models, illustrating the mean difference in FEV<sub>1</sub>pp among those with vs without allergic rhinitis.**

The model with FEV<sub>1</sub>pp pre-BD at study entry as dependent variable included recurrent wheeze, dyspnea, longstanding cough, productive cough, age, BMI category, smoking and original cohort as independent variables.

The model with FEV<sub>1</sub>pp pre-BD at follow-up as dependent variable included recurrent wheeze, dyspnea, longstanding cough, productive cough, age, BMI category, high BMI increase smoking, ICS use, occupational exposure to GDF and original cohort as independent variables.

NAR=No allergic rhinitis (♦). AR=Allergic rhinitis (●).

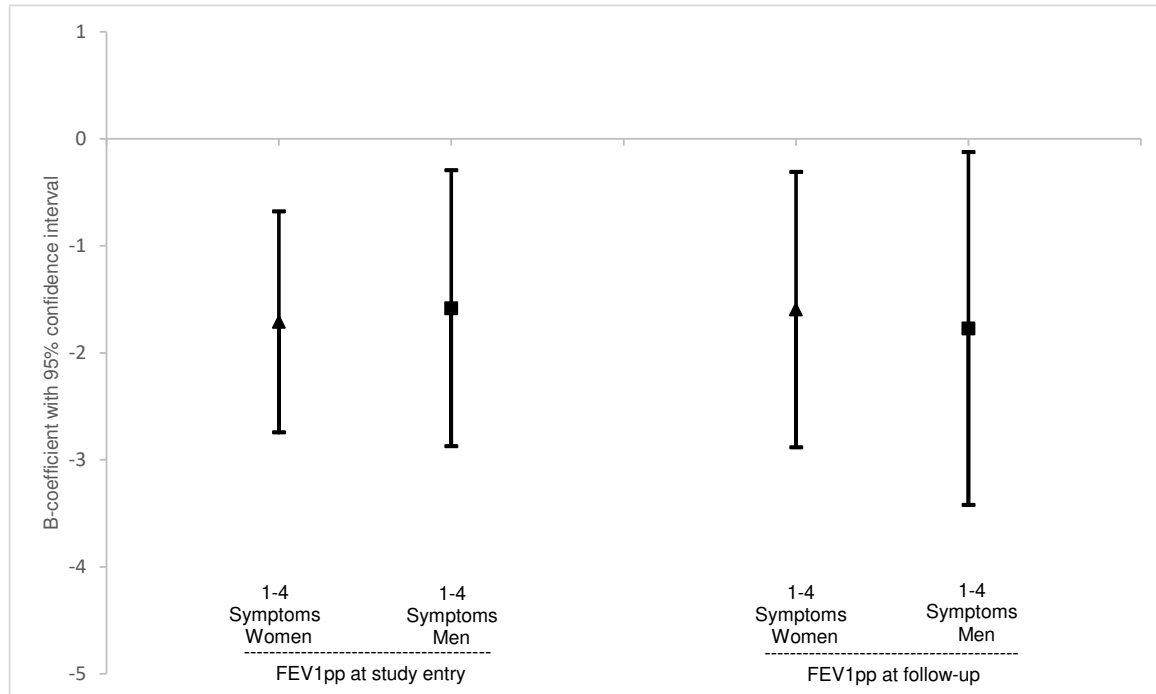

**Supplemental Figure 2 Association of number of respiratory symptoms at study entry as a continuous variable with FEV<sub>1</sub>pp at study entry and follow-up after adjusting for other factors among women and men. Results expressed as B-coefficients with 95% confidence intervals from linear regression models, illustrating the mean difference in FEV<sub>1</sub>pp among those with 1 vs 2, 2 vs 3 and 3 vs 4 symptoms.**

The model with FEV<sub>1</sub>pp pre-BD at study entry as dependent variable included the number of respiratory symptoms, age, BMI category, smoking and original cohort as independent variables.  
 The model with follow-up FEV<sub>1</sub>pp pre-BD as dependent variable included the number of respiratory symptoms, age, BMI category, high BMI increase, smoking, ICS use, occupational exposure to GDF and original cohort as independent variables.  
 W=Women (▲). M=Men (■). Those reporting 0 symptoms were merged with those reporting 1 symptom in this analysis.

| Supplemental Table 2 FEV <sub>1</sub> pp pre-BD at study entry by type and number of respiratory symptoms among non-participants at follow-up |         |                  |                    |         |                  |                    |         |                  |  |
|-----------------------------------------------------------------------------------------------------------------------------------------------|---------|------------------|--------------------|---------|------------------|--------------------|---------|------------------|--|
| Women N=574                                                                                                                                   |         |                  | Men N=478          |         |                  | All N=1052         |         |                  |  |
| Recurrent wheeze                                                                                                                              | No      | 82.7 (21.0)      | Recurrent wheeze   | No      | 81.8 (20.3)      | Recurrent wheeze   | No      | 82.3 (20.7)      |  |
|                                                                                                                                               | Yes     | 79.5 (20.3)      |                    | Yes     | 76.4 (18.7)      |                    | Yes     | 78.1 (19.7)      |  |
|                                                                                                                                               | P-value | 0.119            |                    | P-value | <b>0.012</b>     |                    | P-value | <b>0.004</b>     |  |
| Dyspnea                                                                                                                                       | No      | 85.1 (17.3)      | Dyspnea            | No      | 82.9 (16.4)      | Dyspnea            | No      | 84.0 (16.9)      |  |
|                                                                                                                                               | Yes     | 73.6 (22.7)      |                    | Yes     | 66.5 (19.8)      |                    | Yes     | 70.8 (21.8)      |  |
|                                                                                                                                               | P-value | <b>&lt;0.001</b> |                    | P-value | <b>&lt;0.001</b> |                    | P-value | <b>&lt;0.001</b> |  |
| Longstanding cough                                                                                                                            | No      | 80.7 (20.2)      | Longstanding cough | No      | 78.6 (18.5)      | Longstanding cough | No      | 79.7 (19.4)      |  |
|                                                                                                                                               | Yes     | 79.8 (20.9)      |                    | Yes     | 76.2 (19.9)      |                    | Yes     | 78.2 (20.5)      |  |
|                                                                                                                                               | P-value | 0.591            |                    | P-value | 0.174            |                    | P-value | 0.224            |  |
| Productive cough                                                                                                                              | No      | 83.0 (18.5)      | Productive cough   | No      | 83.6 (16.1)      | Productive cough   | No      | 83.3 (17.5)      |  |
|                                                                                                                                               | Yes     | 77.1 (22.2)      |                    | Yes     | 72.1 (20.1)      |                    | Yes     | 74.7 (21.3)      |  |
|                                                                                                                                               | P-value | <b>0.001</b>     |                    | P-value | <b>&lt;0.001</b> |                    | P-value | <b>&lt;0.001</b> |  |
| 0-1 symptoms                                                                                                                                  |         | 85.8 (17.0)      | 0-1 symptoms       |         | 84.2 (16.9)      | 0-1 symptoms       |         | 85.0 (16.9)      |  |
| 2 symptoms                                                                                                                                    |         | 79.8 (21.0)      | 2 symptoms         |         | 77.3 (17.0)      | 2 symptoms         |         | 78.7 (19.3)      |  |
| 3 symptoms                                                                                                                                    |         | 78.8 (20.3)      | 3 symptoms         |         | 76.2 (18.6)      | 3 symptoms         |         | 77.6 (19.6)      |  |
| 4 symptoms                                                                                                                                    |         | 71.9 (23.4)      | 4 symptoms         |         | 64.8 (21.5)      | 4 symptoms         |         | 68.7 (22.8)      |  |
| P-value                                                                                                                                       |         | <b>&lt;0.001</b> | P-value            |         | <b>&lt;0.001</b> | P-value            |         | <b>&lt;0.001</b> |  |
| Results for the type of symptoms presented as n (%) and p-values from T-test in bold figures indicate p<0.05                                  |         |                  |                    |         |                  |                    |         |                  |  |
| Results for the number of symptoms presented as Mean (Standard deviation) and p-values from ANOVA in bold figures indicate p<0.05             |         |                  |                    |         |                  |                    |         |                  |  |
| pre-BD = pre-bronchodilatation. Non-participants at follow-up (n=1078). Missing FEV <sub>1</sub> pp at study entry (n=26)                     |         |                  |                    |         |                  |                    |         |                  |  |

**Supplemental Table 3 Analysis of potential confounders by linear regression with results expressed as B-coefficients with corresponding 95% confidence intervals and p-values**

|                                        | Total<br>N=977 |                         |                  |
|----------------------------------------|----------------|-------------------------|------------------|
|                                        | B              | 95% Confidence Interval | P-value          |
| <b>FEV1pp pre-BD at study entry</b>    |                |                         |                  |
| Sex (Male)                             | -3.55          | (-5.22 - -1.88)         | <b>&lt;0.001</b> |
| Age at study entry                     | -0.32          | (-0.39 - -0.24)         | <b>&lt;0.001</b> |
| Underweight                            | -2.95          | (-6.76 - 0.86)          | 0.129            |
| Overweight                             | -0.78          | (-2.69 - 1.13)          | 0.423            |
| Obese                                  | -3.34          | (-5.88 - -0.79)         | <b>0.010</b>     |
| BMI missing                            | -2.30          | (-7.63 - 3.02)          | 0.397            |
| Ex-smokers at study entry              | -0.83          | (-2.82 - 1.16)          | 0.412            |
| Current smokers at study entry         | -2.96          | (-4.95 - -0.97)         | <b>0.004</b>     |
| <b>FEV1pp pre-BD at follow-up</b>      |                |                         |                  |
| Sex (Male)                             | -8.78          | (-10.88 - -6.68)        | <b>&lt;0.001</b> |
| Age at follow-up                       | -0.27          | (-0.36 - -0.19)         | <b>&lt;0.001</b> |
| Underweight at study entry             | -4.47          | (-8.84 - -0.11)         | 0.045            |
| Overweight at study entry              | -0.04          | (-2.23 - 2.14)          | 0.968            |
| Obese at study entry                   | -0.73          | (-3.64 - 2.19)          | 0.624            |
| BMI missing at study entry             | 0.55           | (-5.46 - 6.57)          | 0.857            |
| High BMI increase                      | -2.89          | (-5.13 - -0.65)         | <b>0.012</b>     |
| Ex-smokers at follow-up                | -1.68          | (-4.03 - 0.68)          | 0.162            |
| Quitters at follow-up                  | -7.40          | (-10.24 - -4.56)        | <b>&lt;0.001</b> |
| Current smokers at follow-up           | -12.44         | (-15.54 - -9.33)        | <b>&lt;0.001</b> |
| ICS use at follow-up                   | -5.93          | (-7.86 - -4.00)         | <b>&lt;0.001</b> |
| Occupational GDF exposure at follow-up | 0.66           | (-1.44 - 2.76)          | 0.539            |
| <b>Annual decline in FEV1pp</b>        |                |                         |                  |
| Sex (Male)                             | -0.23          | (-0.31 - -0.14)         | <b>&lt;0.001</b> |
| Age at follow-up                       | 0.00           | (0.00 - 0.00)           | 0.485            |
| Underweight at study entry             | -0.10          | (-0.28 - 0.08)          | 0.266            |
| Overweight at study entry              | 0.06           | (-0.03 - 0.15)          | 0.197            |
| Obese at study entry                   | 0.13           | (0.02 - 0.25)           | <b>0.027</b>     |
| BMI missing at study entry             | 0.05           | (-0.19 - 0.30)          | 0.667            |
| High BMI increase                      | -0.16          | (-0.25 - -0.07)         | <b>&lt;0.001</b> |
| Ex-smokers at follow-up                | -0.06          | (-0.16 - 0.03)          | 0.197            |
| Quitters at follow-up                  | -0.16          | (-0.28 - -0.05)         | <b>0.005</b>     |
| Current smokers at follow-up           | -0.37          | (-0.50 - -0.25)         | <b>&lt;0.001</b> |
| ICS use at follow-up                   | -0.03          | (-0.11 - 0.05)          | 0.457            |
| Occupational GDF exposure at follow-up | -0.03          | (-0.11 - 0.06)          | 0.519            |

B = Beta-coefficient from linear regression models. Bold values indicate p&lt;0.05

Normal weight at study entry (reference category) (n=441)  
Underweight (n=50), Overweight (n=328), Obese (n=133), BMI missing (n=75) (not shown)  
BMI increase < 4.92 (reference category) (n=714), BMI increase > 4.92 (n=237)  
Never smokers at study entry (reference category) (n=435)  
Ex-smokers (n=277), Current Smokers (n=265)  
Cohort I (reference category) (n=171)  
Cohort II (n=414), Cohort III (n=83), Cohort IV (n=108), Cohort V (n=201). Results not shown.  
Constantly non-smokers (reference category) (n=418)  
Ex-Smokers at follow-up = Non-smokers or ex-smokers to ex-smokers (n=253)  
Quitters = Smokers to ex-smokers (n=143)  
Current smokers at follow-up = Non, ex, or current smokers to smokers (n=114)  
Follow-up smoking residual group (n=49) (not shown)  
ICS use at follow-up = Yes (n=429) No (n=548)  
Occupational GDF exposure at follow-up = Yes (n=371) No (n=606)  
Cohort I (reference category) (n=171)  
Cohort II (n=414) Cohort III (n=83) Cohort IV (n=108) Cohort V (n=201). Results not shown

**Supplemental Table 4 Regression analyses for FEV1pp at study entry and follow-up and each type of symptom both unadjusted and adjusted with results expressed as B-coefficients with corresponding 95% confidence intervals**

|                                                                                                                                                                                                                    |       | Unadjusted |                         | Adjusted |                         |
|--------------------------------------------------------------------------------------------------------------------------------------------------------------------------------------------------------------------|-------|------------|-------------------------|----------|-------------------------|
|                                                                                                                                                                                                                    |       | B          | 95% Confidence interval | B        | 95% Confidence interval |
| <b>FEV1pp pre-BD at study entry</b>                                                                                                                                                                                |       |            |                         |          |                         |
| Recurrent wheeze                                                                                                                                                                                                   | Women | -3.30      | (-5.88 - -0.71)         | -4.49    | (-7.08 - -1.91)         |
|                                                                                                                                                                                                                    | Men   | -4.55      | (-7.85 - -1.25)         | -5.38    | (-8.61 - -2.15)         |
| Dyspnea                                                                                                                                                                                                            | Women | -4.82      | (-7.06 - -2.59)         | -3.84    | (-6.03 - -1.65)         |
|                                                                                                                                                                                                                    | Men   | -5.68      | (-9.59 - -1.77)         | -4.35    | (-8.17 - -0.53)         |
| Longstanding cough                                                                                                                                                                                                 | Women | -1.00      | (-3.12 - 1.13)          | -0.85    | (-2.93 - 1.23)          |
|                                                                                                                                                                                                                    | Men   | -1.91      | (-4.78 - 0.96)          | -1.05    | (-3.96 - 1.86)          |
| Productive cough                                                                                                                                                                                                   | Women | -2.20      | (-4.41 - 0.01)          | -1.28    | (-3.41 - 0.86)          |
|                                                                                                                                                                                                                    | Men   | -2.78      | (-5.71 - 0.15)          | -0.99    | (-3.89 - 1.92)          |
| <b>FEV1pp pre-BD at follow-up</b>                                                                                                                                                                                  |       |            |                         |          |                         |
| Recurrent wheeze                                                                                                                                                                                                   | Women | -4.24      | (-7.42 - -1.05)         | -4.50    | (-7.72 - -1.28)         |
|                                                                                                                                                                                                                    | Men   | -4.73      | (-8.35 - -1.12)         | -3.74    | (-7.23 - -0.26)         |
| Dyspnea                                                                                                                                                                                                            | Women | -3.59      | (-6.37 - -0.80)         | -2.77    | (-5.50 - -0.04)         |
|                                                                                                                                                                                                                    | Men   | -4.33      | (-8.64 - -0.02)         | -2.97    | (-7.02 - 1.07)          |
| Longstanding cough                                                                                                                                                                                                 | Women | -1.27      | (-3.89 - 1.34)          | -1.14    | (-3.71 - 1.44)          |
|                                                                                                                                                                                                                    | Men   | -2.75      | (-5.89 - 0.39)          | -1.83    | (-4.89 - 1.24)          |
| Productive cough                                                                                                                                                                                                   | Women | -3.33      | (-6.04 - -0.61)         | -1.38    | (-4.03 - 1.28)          |
|                                                                                                                                                                                                                    | Men   | -3.30      | (-6.50 - -0.09)         | -0.82    | (-3.90 - 2.26)          |
| Unadjusted models include the respective symptom only                                                                                                                                                              |       |            |                         |          |                         |
| Unadjusted models had R square values of 0.002-0.032 and adjusted R square values of 0.001-0.030.                                                                                                                  |       |            |                         |          |                         |
| Adjusted models with FEV1pp pre-BD at study entry include the respective symptom, age BMI categories, smoking and original cohort as independent variables                                                         |       |            |                         |          |                         |
| Adjusted models with FEV1pp pre-BD at follow-up include the respective symptom, age BMI categories, high BMI increase, smoking, ICS use, occupational exposure to GDF and original cohort as independent variables |       |            |                         |          |                         |
| Adjusted models had R square values of 0.127-0.230 and adjusted R square values 0.103-0.199.                                                                                                                       |       |            |                         |          |                         |
